**Developmental switching in *Physarum polycephalum*: Petri net analysis of single cell trajectories of gene expression indicates responsiveness and genetic plasticity of the Waddington quasipotential landscape**

Britta Werthmann and Wolfgang Marwan\*

Magdeburg Centre for Systems Biology and Institute of Biology,  
Otto-von-Guericke-Universität, Pfälzerstrasse 5, 39106 Magdeburg

\*corresponding author: [wolfgang.marwan@ovgu.de](mailto:wolfgang.marwan@ovgu.de)

**Keywords:** *Physarum polycephalum*, phytochrome, cell differentiation, cell fate, attractor

## Abstract

The developmental switch to sporulation in *Physarum polycephalum* is a phytochrome-mediated far-red light-induced cell fate decision that synchronously encompasses the entire multinucleate plasmodial cell and is associated with extensive reprogramming of the transcriptome. By repeatedly taking samples of single cells after delivery of a light stimulus pulse, we analysed differential gene expression in two mutant strains and in a heterokaryon of the two strains all of which display a different propensity for making the cell fate decision. Multidimensional scaling of the gene expression data revealed individually different single cell trajectories eventually leading to sporulation. Characterization of the trajectories as walks through states of gene expression discretized by hierarchical clustering allowed the reconstruction of Petri nets that model and predict the observed behavior. Structural analyses of the Petri nets indicated stimulus- and genotype-dependence of both, single cell trajectories and of the quasipotential landscape through which these trajectories are taken. The Petri net-based approach to the analysis and decomposition of complex cellular responses and of complex mutant phenotypes may provide a scaffold for the data-driven reconstruction of causal molecular mechanisms that shape the topology of the quasipotential landscape.

## 1. Introduction

Conrad Hal Waddington introduced the metaphor of an epigenetic landscape to intuitively explain canalization of development and cell fate determination during embryogenesis and its dependence on gene mutations [1]. He thought of cells that make developmental decisions to differentiate into alternative cell types as marbles rolling down a landscape with multiple bifurcating valleys finally ending up in separate valleys that correspond to the alternative states of terminal differentiation. The specific topology of this landscape, according to his metaphor, is determined by an underlying layer of genes with ropes attached that pull the "epigenetic" landscape (the landscape arranged like a sailcloth above the genes) into shape [1]. Alterations to those genes would ultimately reshape the topology with impact on the

development of an individual. This is where the term epigenetics originally comes from.

Theoretical considerations of multistability in boolean network models of gene regulatory networks has provided a theoretical basis for a possible molecular interpretation of Waddington's landscape. It may be understood as a quasipotential landscape (QPL) of a dynamic system of coupled biochemical reactions that form feedback loops. The valleys of the QPL then correspond to different attractors and the altitude of the mountaintops is a measure for the unlikeliness that the system will be in a particular state while the state space of the system is projected into the two-dimensional plane [2-8].

From bacteriophages to mammals, decision-making in the regulation of cell cycle, differentiation, and development is central to a wide variety of developmental phenomena. Indeed, in cases where molecular mechanisms have been elucidated, it could be computationally demonstrated that such phenomena can be readily explained on the basis of bistability and multistability of the underlying biochemical reaction networks [9-19]. Computational approaches have also shown how well-known kinetic mechanisms of interacting biomolecules can result in a quasipotential landscape with multiple attractors and how mechanisms of stem cell differentiation, transdifferentiation, and carcinogenesis can be understood in the context of a quasipotential landscape [6, 8, 20-25]. Most recently, a synthetic gene regulatory network of inducible promoters and transcriptional regulators with mutual inhibitions and autoactivations implemented in *Escherichia coli*, was experimentally shown to exhibit quadrastability. Elegant experimental and computational evidence demonstrated that the topology of the resulting quasipotential landscape depends on the connectivity within a network with systematically permuted connectivity [26].

The concept of a quasipotential landscape to regulate cell fate determination offers more than just a theoretical framework to explain multistability. It suggests that attractors and the multistability of functional states of the regulatory network of a cell can eventually be reached through several alternative pathways of cellular regulation that are taken and that cells can switch between stable or meta-stable states as a result of stochasticity or transient perturbation of the reaction network [2]. A rugged landscape enabling variable pathways could emerge from evolutionary constraints on the versatility, adaptability, and robustness of regulatory networks that led to the development of highly complex networks in order to gain a sufficient degree of fitness.

Obviously, variable pathways connecting different attractors of a QPL might not only lead to states of disease but also be exploited for rationally-designed medical treatment [24, 27].

Variable pathways for switching between two states of cell differentiation have been directly demonstrated in the unicellular eukaryote *Physarum polycephalum* quite a number of years ago [28]. Morphological intermediates in the form of mitotic figures and cytoskeletal rearrangements that occur during the development of an amoebal cell into a plasmodium were directly observed in the light microscope [28]. At the molecular level, variable pathways have also been demonstrated for the development of the *P. polycephalum* plasmodium into fruiting bodies (sporulation) which is another differentiation process that occurs in the course of the life cycle [29].

For several reasons, the sporulating plasmodium is a great object for studying differentiation at the single cell level [30]. The plasmodium is a giant single cell that can be grown to arbitrary size. Because the myriad of nuclei that are suspended in its cytoplasm display natural synchrony in cell cycle regulation and differentiation [31-36], the plasmodium provides a source from which macroscopic samples of homogeneous cell material can be repeatedly taken in order to analyse how the molecular components change as a function of time. To set a defined starting point, sporulation of a starving plasmodium can be triggered by a short pulse of far-red light which switches a phytochrome photoreceptor into its active state [37-39]. At around five to six hours after the pulse, the plasmodium becomes irreversibly committed to sporulation [30]. The formation of fruiting bodies starts at approximately eleven hours and the macroscopically visible morphogenesis is completed at about 18 hours after the pulse (Fig. 1). During the formation of the mature fruiting body, the protoplasm is cleaved and mononucleate, haploid spores are formed by meiosis.

Sporulation is associated with a cascade of differentially expressed genes [40-43]. By repeatedly taking samples at different time points after triggering sporulation with a far-red light pulse, we have shown that individual plasmodial cells proceed to sporulation along variable pathways that are characterized by qualitatively different correlation patterns of differentially expressed genes [29].

Here, we identify main trajectories of *P. polycephalum* plasmodial cells that had been exposed to a differentiation-inducing far-red light stimulus. Based on single cell trajectories, we construct a Petri net that, at the level of the phenotype models and predicts the transition between discretized states of gene expression and which formally links these states to the differential regulation of specific genes.

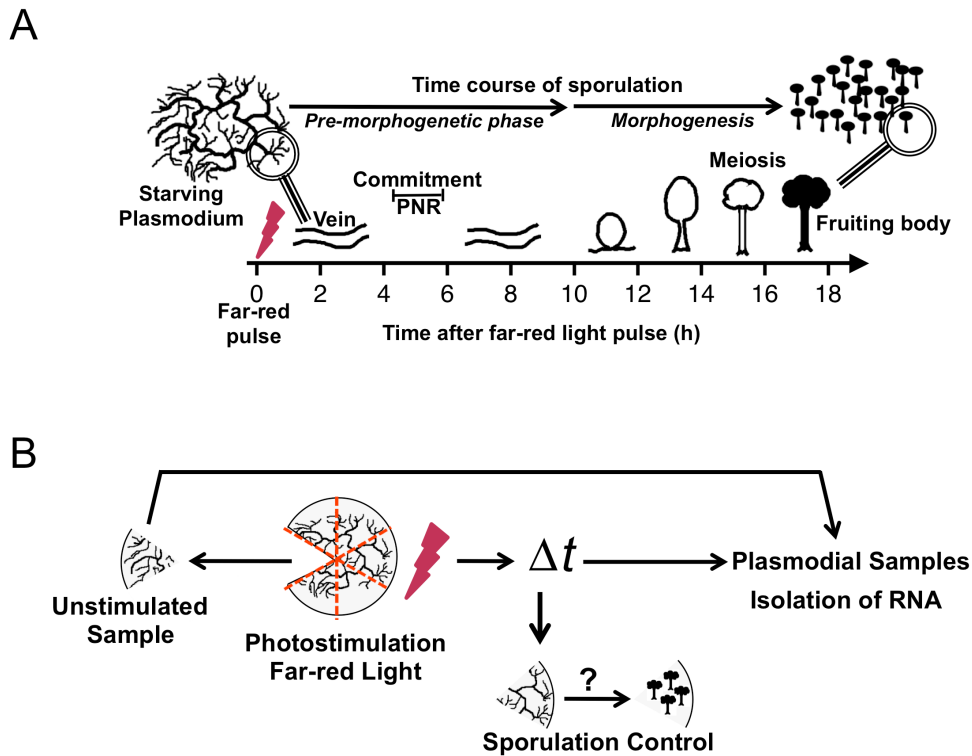

**Figure 1.** Time course of commitment and sporulation of a *P. polycephalum* plasmodium and preparation of samples for gene expression time series datasets. (A) Sporulation of a starving, competent, multinucleate (macro-) plasmodium can be triggered by a brief pulse of far-red light which is sensed by a phytochrome photoreceptor. After the inductive light pulse there is a pre-morphogenetic phase of about 9 to 10 hours without any visible changes in the plasmodial morphology. By crossing the point of no return (PNR) at four to six hours after induction, the plasmodium is committed to sporulation and loses its ability to grow on nutrient agar. Morphogenesis starts when the plasmodial strands wind up and subsequently dissociate into small nodular structures (nodulation stage). Each nodule culminates and differentiates into a melanized fruiting body. Meiosis and cleavage of the multinucleate protoplasmic mass results in the formation of haploid, mononucleate spores that are released when the fruiting body ruptures. Under favourable conditions, a haploid, mononucleate amoeba can hatch from a spore to start a new life cycle [67]. (B) Collection of plasmodial samples for the measurement of gene expression time series. Starved plasmodial cells (each Petri dish contained one plasmodial cell on a plate of starvation agar) were stimulated with a pulse of far-red light and returned to the dark (for details see Materials and Methods). Before (referred to as 0h sample) and at various time points (2h, 6h, 8h, 11h) after the stimulus pulse, samples from the plasmodium were taken with a spatulum and shock frozen in liquid nitrogen for the subsequent isolation of RNA. The remainder of the plasmodium was further incubated until the next day to see whether the developmental decision to sporulation has occurred (sporulation control). For obtaining dark control time series, the experiment was performed exactly as described above, but the far-red light stimulus was omitted. Finally, the gene expression pattern in each sample was analysed.

Experimental comparison of mutants with different propensities to sporulate and structural analysis of the derived Petri nets indicates both, responsiveness and genetic plasticity of the quasipotential landscape. Petri nets that predict single cell trajectories by decomposing complex phenotypes may serve as formal scaffolds for the reconstruction (reverse engineering) of causal molecular mechanisms that define and shape the quasipotential landscape from experimental data.

## 2. Methods

### 2.1. *Strains and growth of cell material*

Cells of strains of PHO3 [44] and PHO57 [45] that were isolated in genetic screens for mutants with reduced propensity for light-induced sporulation were grown as microplasmodial suspensions in a fermenter for four days, harvested, washed, and the plasmodial paste allowed to dry on five layers of filter paper for 30 minutes. A ring of 1 g of cell paste (fresh weight) was applied to the centre of a 9 cm  $\varnothing$  Petri dish containing starvation agar using a motor-driven 50-mL syringe coupled to an in-house built automatic device for rotating the agar plate around its axis. Plasmodial cells were subsequently allowed to fuse on starvation agar so that a single macroplasmodium developed on each plate. Macroplasmodia were starved for 7 days in complete darkness at 22°C. Experimental conditions including media for growth and starvation were exactly as previously described [45]. Heterokaryons were obtained by applying 1 g of a 1:1 mixture of plasmodial pastes of strains PHO3 and PHO57 to the starvation agar plate and further incubated as described above.

### 2.2. *Stimulation of plasmodial cells, preparation of samples, and gene expression analysis*

Starved plasmodial cells (each Petri dish contained one plasmodial cell) were stimulated with a pulse of far-red light ( $\lambda \geq 700$  nm, 13 W/m<sup>2</sup>) as described (Starostzik & Marwan 1998) and returned to the dark (22°C). Before (referred to as 0 h sample) and at various time points (2 h, 6 h, 8 h, 11 h) after the stimulus pulse, samples from the plasmodium were taken with a spatula and shock frozen in liquid

nitrogen for the subsequent isolation of RNA. The remainder of the plasmodium was further incubated until the next day and served as a sporulation control that indicated whether the developmental decision to sporulation occurred (Fig. 1B). Alternatively, time series were taken exactly as described while omitting the far-red light stimulus pulse (dark control time series). Total RNA was isolated from each sample separately, reverse transcribed, and the relative expression level of 35 marker genes (Supplementary Table 1) quantified by GeXP multiplex reverse transcription–polymerase chain reaction (RT–PCR) as previously described [45]. Primer sequences are described in [46]. One time series dataset was obtained for each plasmodial cell. A genes that showed differential regulation in response to far-red light stimulation were selected for further analysis (Table 1).

### 2.3. Statistical methods

*2.3.1. Normalization of the gene expression data.* Gene expression data were normalized to the values measured in the dark control time series. To do so, the mean of the expression values of all samples taken from cells that had not been exposed to a far-red light stimulus was calculated for each gene separately and the expression values for each gene measured in samples of far-red light stimulated plasmodia were normalized to the mean of the respective gene as calculated by averaging the values of the dark control time series.

#### *2.3.2. Generation of heat maps and hierarchical clustering.*

Clustering and visualization of the normalized gene expression data were performed with the function *heatmap.2* in R (Version 3.1.3). In parallel, significant cluster analysis ( $\alpha = 0.001$ ) was performed using the function *simprof* as part of the package *clustsig* [47]. Both functions employ the function *hclust* {Murtagh, 1985 #1747}.

*2.3.3. Multidimensional scaling.* After normalization of the gene expression data (see above), a structure representing the euclidian distance was computed by the function *dist* which is part of the *stats* library. Classical multimimensional scaling (MDS) of the gene expression data in two dimensions ( $k=2$ ) was then performed on the distances using the function *cmdscale()* in R (Version 3.1.3) which is also part of the *stats* library and plotted with *plot()* contained in *graphics*.

**Table 1.** Differentially regulated genes analysed for the reconstruction of single cell trajectories named according to their orthologs in the Uniprot database. Differential regulation is indicated for each gene as it occurs in cells committed to sporulation.

| Gene        | Similarity                                           | UniProt ID | E-value | Query coverage (%) | Differential regulation |
|-------------|------------------------------------------------------|------------|---------|--------------------|-------------------------|
| <i>psgA</i> | <i>Physarum</i> specific gene                        | NA         | NA      | NA                 | down                    |
| <i>pldC</i> | Phospholipase D                                      | Q9LRZ5     | 4E-14   | 61                 | down                    |
| <i>pldB</i> | Phosphatidylinositol-glycan-specific phospholipase D | P80108     | 1E-80   | 83                 | down                    |
| <i>pikB</i> | Phosphatidylinositol 3-kinase 2                      | P54674     | 3E-63   | 68                 | down                    |
| <i>pumA</i> | Pumilio homolog 2                                    | Q80U58     | 2E-46   | 80                 | down                    |
| <i>anxA</i> | Annexin-B12                                          | P26256     | 6E-41   | 98                 | down                    |
| <i>pptA</i> | Phosphatase DCR2                                     | Q05924     | 6E-19   | 59                 | up                      |
| <i>cdcA</i> | Cell division control protein 31                     | P06704     | 6E-27   | 38                 | up                      |
| <i>pakA</i> | Serine/threonine-protein kinase pakC                 | Q55GV3     | 3E-48   | 79                 | up                      |
| <i>pldA</i> | Phosphatidylinositol-glycan-specific phospholipase D | Q8R2H5     | 4E-62   | 91                 | up                      |
| <i>ligA</i> | Checkpoint protein hus1 homolog 1 (LigA)             | Q54NC0     | 1E-28   | 94                 | up                      |
| <i>pwiA</i> | Piwi-like protein 1                                  | Q96J94     | 2E-55   | 92                 | up                      |
| <i>rgsA</i> | Regulator of G-protein signaling 2                   | O08849     | 3E-05   | 31                 | up                      |



## 2.4. Petri net modelling and analysis

Petri nets were drawn in Snoopy [48] and printed as pdf's. T-invariants were analysed in Charlie as described [49] and graphically displayed in Snoopy as described in the Supplementary Movie 1.

## 3. Results

### 3.1. Multidimensional scaling analysis reveals variable trajectories of individual cells

To investigate the variability of pathways a plasmodium can take to commitment and sporulation and their dependence in the genotype, we analysed two strains, PHO3 and PHO57 that were isolated in a genetic screen for mutants with reduced propensity to sporulate [45]. When starved PHO3 plasmodia were irradiated with a saturating pulse of far-red light, only approximately half of the population sporulated. The entire protoplasmic mass of each plasmodium sporulated as a whole or did not sporulate at all, indicating that the probability for entering the developmental pathway is reduced as compared to the wild-type while the decision for sporulation to occur was still all-or-none in each plasmodium.

Plasmodial cells of strain PHO3 were starved for six days and exposed to a far-red light stimulus. Before and at different time points after the stimulus, a sample was taken from each plasmodium to analyse the expression pattern of a set of genes that are up- or down-regulated in the wild-type in association with developmental switching [36, 46] (Fig 1B). The remainder of the plasmodium was incubated until the next day to see whether sporulation had occurred. For the dark controls, plasmodia were not exposed to far-red light but otherwise treated identical. Comparative display of the time-series data obtained for each plasmodial cell revealed a group of genes that were up-regulated in the subpopulation of cells committed to sporulation as it had previously been found for the

wild-type [46]. In order to group cells with respect to the similarity of the expression patterns, we pooled and normalized the entire data set (see Materials and Methods for details), performed a hierarchical cluster analysis of the expression values [50], and displayed the results in the form of a heat map (Fig. 2A). Subsequently, we performed a multidimensional scaling analysis [51] to arrange the data points according to their similarity as projected into a two-dimensional plane. Clearly, data points were unevenly spread over the area of the plot and there were certain regions where data points from sporulated or from non-sporulated plasmodia were predominantly located (Fig. 2B). Data points that were assigned to a cluster by MDA could be assigned to a corresponding cluster in the MDS plot (Fig. 2A,B; dashed lines), indicating that the obtained results were consistent. We then reconstructed the trajectory for each individual cell by connecting the data points in the MDS plots according to their temporal order. The trajectories of the sporulated plasmodia moved towards the lower left corner of the MDS plot while the non-sporulated plasmodia behaved differently (Fig. 2C). One feature however was the same for all plasmodia in the data set. All trajectories spanned regions corresponding to more than one cluster, suggesting that plasmodia switched between different gene expression patterns, even those cells that had not been stimulated by a light pulse. Similar analyses performed with the non-sporulating strain PHO57 and with the PHO3+PHO57 heterokaryon suggest that cluster formation, MDS patterns, and single cell trajectories depend on the genotype with respect to the ability of a plasmodium to sporulate (see below).

### *3.2. Reconstructing a Petri net model of state transitions from single cell trajectories*

The two methods, MDA and MDS gave consistent yet complementing results. While MDS visualizes the similarity of the expression patterns of samples in a two-dimensional plane, clustering assigns samples to groups resulting in a statistically significant discretization. Based on this discretization, we reconstructed a Petri net model from the individual trajectories and searched for similarities and differences between the cells of the three groups, dark controls, not sporulated though stimulated, and sporulated in response to stimulation. The gene expression pattern of each plasmodium at each time point as assigned to its associated cluster was listed in a table to obtain a comprehensive representation of all time series (Table 2). This table was translated into a Petri net that models the transitions between the states.

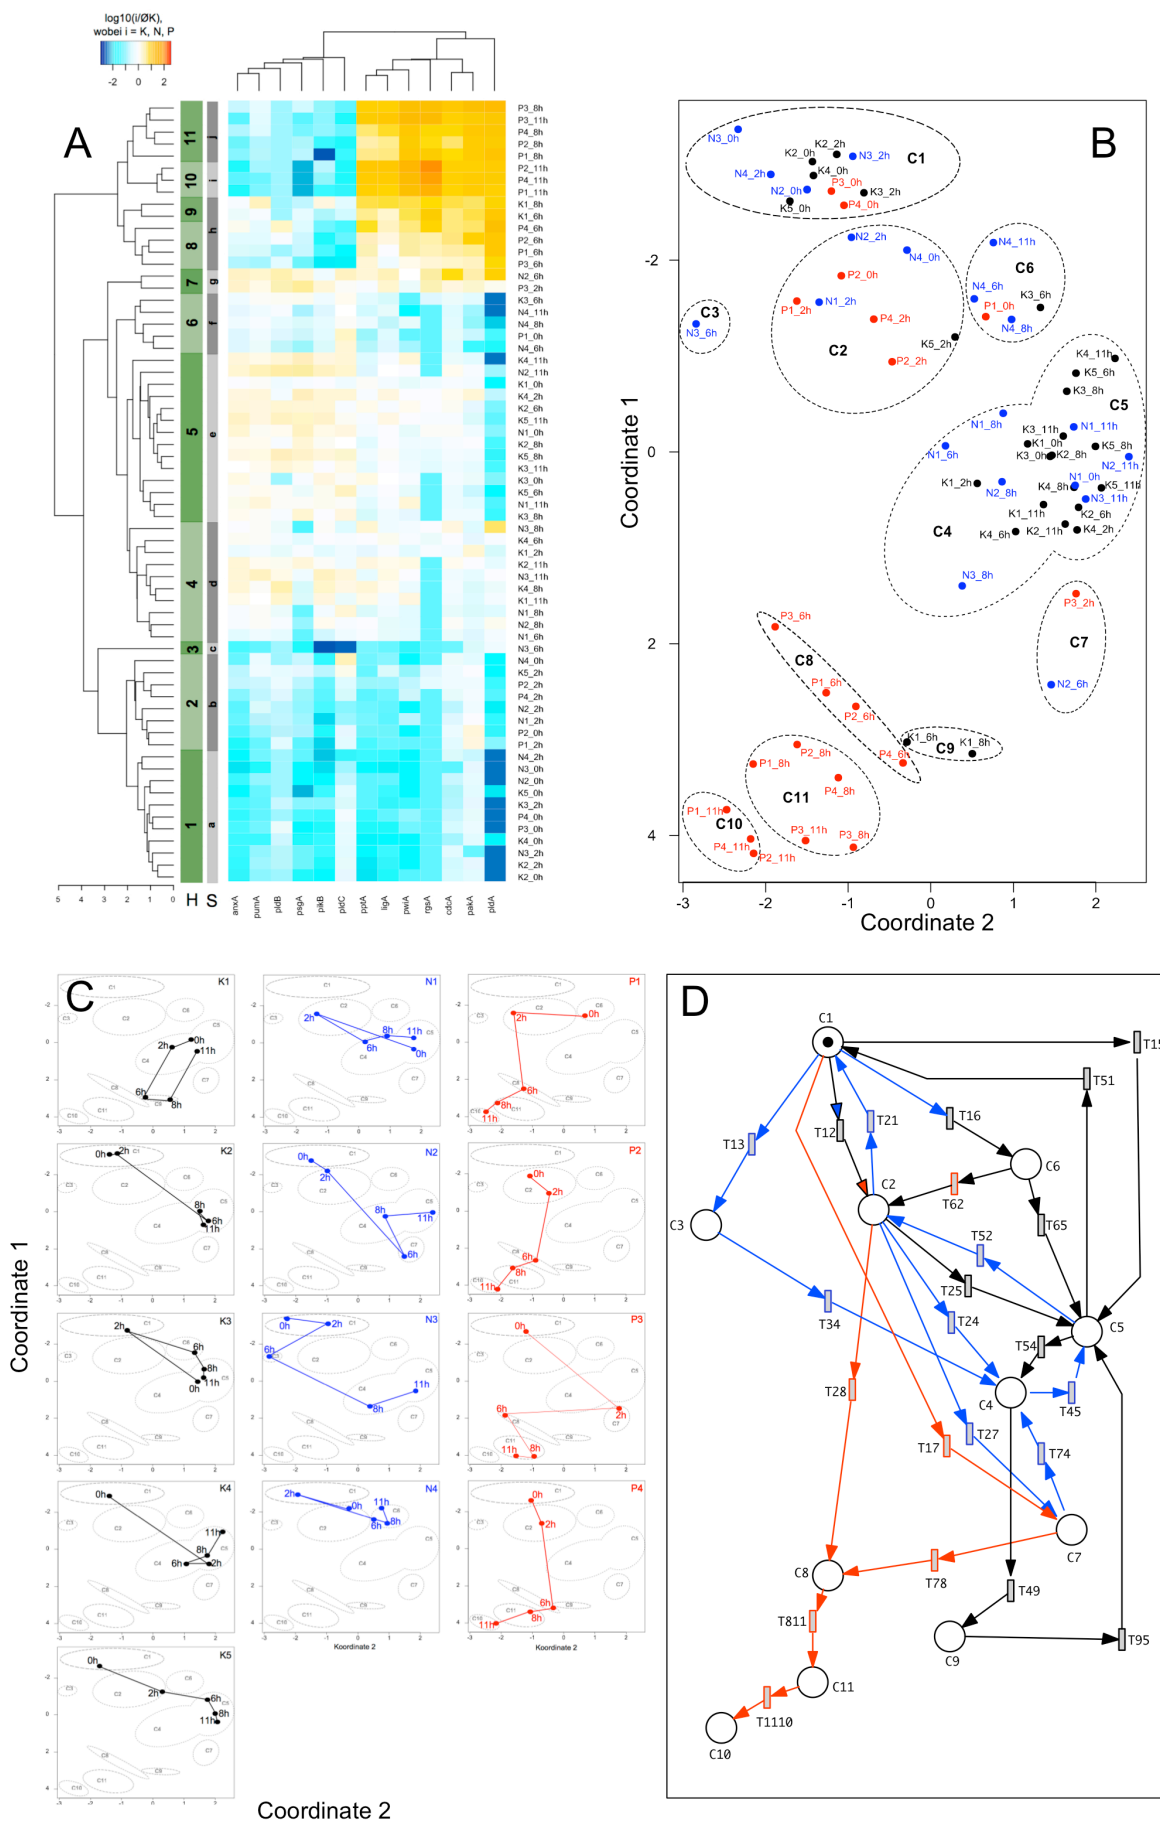

◀ **Figure 2.** Statistical analysis and Petri net model of single cell trajectories of plasmodial cells of strain PHO3. Time series were obtained by repeatedly taking samples from plasmodial cells that were stimulated with far-red light or that were not stimulated (dark control time series), giving one time series for each individual plasmodial cell together with the information whether or not the remainder of the plasmodium had sporulated (Fig 1B). The data points of three groups of plasmodial cells (unstimulated, not sporulated; stimulated, not sporulated; stimulated and sporulated) were pooled for the heat map (A) and the multidimensional scaling (B) or evaluated separately for each individual plasmodial cell (C,D). (A) Heat map and cluster analysis. Clusters as obtained by hierarchical clustering (H) or simprof analysis (S) are indicated. (B) Multidimensional scaling (MDS) plot of the complete dataset. The data points in the MDS plot were assigned to a respective cluster found by hierarchical clustering in (A) and were accordingly marked with a dashed line. (C) Trajectories of differential gene expression. The data points of each time series of the multidimensional scaling plot of (B) were connected to give a trajectory for each plasmodial cell. Spatial regions as assigned to the clusters according to (A) were outlined as in (B). Color coding of trajectories: not stimulated, not sporulated, black; far-red light stimulated, not sporulated, blue; far-red light stimulated, sporulated, red. (D) Petri net reconstructed from the time series of transitions between states of gene expression as shown in Table 1. Places representing the clusters in (A) and (B) were geometrically arranged relative to each other corresponding to the center of each cluster in the MDS plot in (B) so that the information regarding the similarity of expression patterns between the clusters is encoded in the relative spatial position of the Petri net places. Transitions of the Petri net were named according to the places they connect, e.g. transition T12 connects place C1 to place C2 through directed arcs. The color coding of the arcs indicates the group of cells in which the paths were observed: not stimulated, not sporulated, black; far-red light stimulated, not sporulated, blue; far-red light stimulated, sporulated, red. The Petri net place representing the starting point of a single cell trajectory is marked with one token. Upon firing of enabled transitions, the token indicating the gene expression state of the cell moves through the net and creates a trajectory similar to the trajectories in (C). See Materials and Methods for details regarding the computational methods.

Petri nets are broadly used to model concurrent systems with classical applications in computer science, systems engineering, and operations research [52]. Petri nets are also common as a formal language to model and simulate biochemical reaction networks [53, 54] and have been employed to model the transition between physiological states and genetic complementation effects in the photosensory photo-control of sporulation in *Physarum polycephalum* [55]. Petri nets are bipartite directed graphs that are composed of places, transitions and directed arcs (Fig. 3). In biochemical reaction networks, places may represent biochemical components while transitions refer to biochemical reactions [54]. In a more general sense, a place may represent an entity or a certain state. When a place contains one or more tokens this means that the entity is present or that a state is true. A transition in a Petri net is always connected to one or more places by at least one directed arc. Upon firing, the transition can transport a token in the direction defined by the connecting arc and thereby change the marking of the

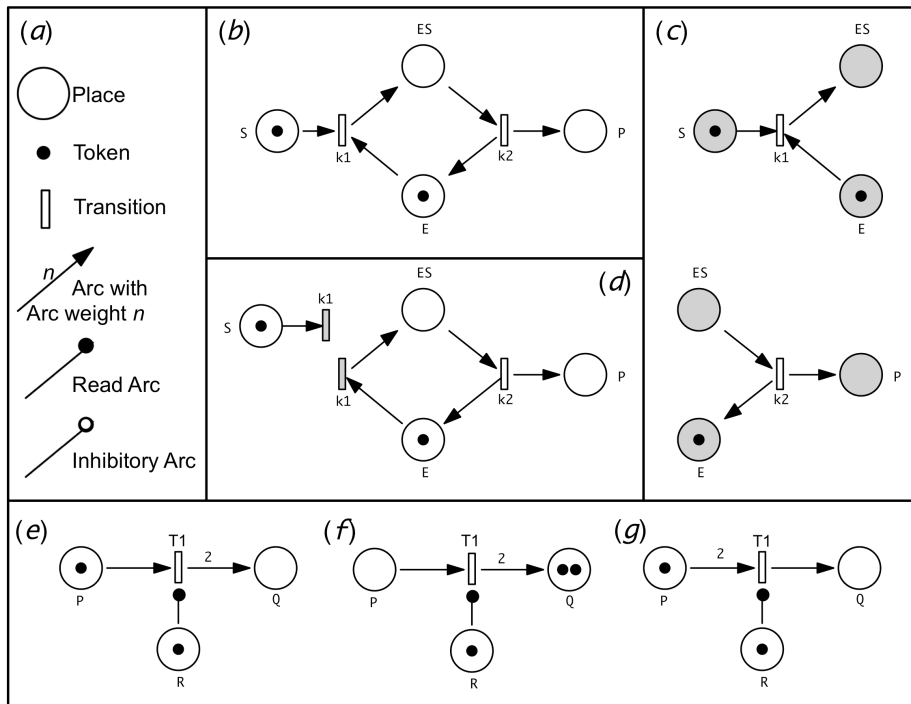

**Figure 3.** Elements of extended Petri nets used in this study and their functionality. (a) Petri nets are bipartite directed graphs in which two types of nodes, places and transitions, are mutually connected by arcs. Extended Petri nets additionally provide read arcs and inhibitory arcs which link a place to a transition to control the enabledness of the transition. (b) Petri net representing an enzyme-catalyzed biochemical reaction in the form of  $E + S \rightarrow ES \rightarrow E + P$ , for simplicity neglecting the reversibility of the reactions. In the example, the places representing substrate and enzyme, respectively, carry one token each, meaning that there is one molecule of substrate and one molecule of enzyme. Transitions represent biochemical reactions. Upon firing, transition  $k_1$  takes one token from S and one token from E and delivers one token in the place representing the enzyme-substrate-complex. As soon as there is a token in place ES, transition  $k_2$  is enabled and may consume the token from ES to put one token each in places P and E. Subsequently, none of the transitions can fire any more, as there is no token in S. In stochastic Petri nets, firing of a transition occurs with a constant probability per unit of time as defined by a rate constant as soon as the transition is enabled. (c), (d) The graphical copy of a node is called logic node and can be used to graphically disentangle a Petri net. In the Petri net tool Snoopy, a node are automatically shaded if it is defined as logic. (c) The Petri net of (b) is represented using logic places for all reactants S, E, ES, and P. Note that the tokens by which a logic place is marked are automatically displayed in all graphical copies of this place. (d) The Petri net of (b) with  $k_1$  defined as a logic transition. Accordingly,  $k_1$  can only fire if the two places, S and E, contain at least one token. (e,f,g) Use of read arcs and the meaning of arc weights. The arc weight is indicated as a number next to an arc. If no arc weight is given, the arc weight by definition is one. As place R is connected to transition  $T_1$  with a read arc with an arc weight of one, the transition can only fire if R is marked by at least one token. The arc weight of standard arcs corresponds to the stoichiometry of token displacement. In other words, it indicates the number of tokens that are transported via the arc connected to the transition when this transition fires. If a pre-place of a

transition contains a number of tokens which is less than the arc weight of a standard arc, or a read arc which is directed to the transition, the transition cannot fire. The marking of a place that is connected via a read arc or an inhibitory arc to a transition does not change when the transition fires. Simply said, read arcs and inhibitory arcs sense rather than transport tokens. When  $T_1$  in the Petri net of (e) fires, it takes, according to the arc weights, one token from P and puts two tokens into Q while the marking of R remains unchanged (f). Transition  $T_1$  in the Petri net of panel (g) cannot fire because there is only one token in P while the arc weight requires that two tokens are consumed from P upon firing of the transition. If place R is connected to transition  $T_1$  with an inhibitory arc instead of the readarc in (e),  $T_1$  can only fire if there are less tokens in place R than indicated by the arc weight of the inhibitory arc (not shown). A brief introduction to Petri nets and to the Petri net tool Snoopy can be found in [68].

connected places (for details see Fig. 3). By firing of a transition and moving of at least one token, the system accordingly transits from one state to another.

For creating a Petri net model that is able to reproduce and predict single cell trajectories by simulation, a place was assigned to each cluster as defined by MDS and MDA. For the graphical representation, the places were put in a position that corresponded to the center of each cluster as it is located in the MDS plot (Fig. 2D). The places were then connected with transitions in a way that each single cell trajectory could be represented by the token moving through the Petri net. The token corresponds to the marble in Waddingtons metaphor (see Introduction). To graphically discriminate the pathways as they were observed in a particular group of plasmodial cells, arcs directing the pathways taken by the dark controls were indicated in black, those of far-red light irradiated but not sporulated cells in blue and those of far-red light-induced and sporulated cells in red. Paths that were taken by plasmodia from more than one group were encoded with two or more colors (e.g. for transitions T12, T16, T62 in Fig. 2C). Note that the coloring of the arcs is only for illustration or visualisation purposes but does not have any functional relevance for the Petri net. Note also, that this is not a "colored Petri net" in the technical sense. Colored Petri net is a technical term for a special class of Petri nets [56].

In Fig. 2D, the coloring of the arcs highlights that there were pathways that were exclusively taken by those plasmodia that had sporulated and some that were predominantly taken by light-exposed plasmodia that did not sporulate, while others were predominantly taken by the dark controls. Certainly, the low number of plasmodial cells in each sample does not allow for any final conclusion regarding the exclusiveness of the pathways which are taken in response to a certain treatment. Nevertheless, our case studies demonstrate how a Petri net analysis of single cell trajectories on MDS data can

**Table 2.** Single cell trajectories of gene expression patterns as discretized by hierarchical clustering. Each line represents the time series measured in an individual plasmodial cell. Cells were labeled as follows. K, not stimulated, not sporulated, N, far-red light stimulated, not sporulated, P, far-red light stimulated, sporulated. Clusters (H) are marked in the heat maps of Figs. 2A and 6A.

### Cells of strain PHO3

| Cell \ time | 0h | 2h | 6h | 8h  | 11h |
|-------------|----|----|----|-----|-----|
| K1          | C5 | C4 | C9 | C9  | C5  |
| K2          | C1 | C1 | C4 | C5  | C5  |
| K3          | C5 | C1 | C6 | C5  | C5  |
| K4          | C1 | C5 | C4 | C5  | C5  |
| K5          | C1 | C2 | C5 | C5  | C5  |
| N1          | C5 | C2 | C4 | C4  | C5  |
| N2          | C1 | C2 | C7 | C4  | C5  |
| N3          | C1 | C1 | C3 | C4  | C5  |
| N4          | C2 | C1 | C6 | C6  | C6  |
| P1          | C6 | C2 | C8 | C11 | C10 |
| P2          | C2 | C2 | C8 | C11 | C10 |
| P3          | C1 | C7 | C8 | C11 | C11 |
| P4          | C1 | C2 | C8 | C11 | C10 |

### Cells of the PHO3+PHO57 heterokaryon

| Cell \ time | 0h | 2h | 6h  | 8h  | 11h |
|-------------|----|----|-----|-----|-----|
| K1          | C1 | C1 | C1  | C1  | C1  |
| K2          | C3 | C1 | C1  | C1  | C1  |
| K3          | C1 | C1 | C1  | C1  | C1  |
| K4          | C1 | C8 | C1  | C1  | C1  |
| N1          | C7 | C6 | C1  | C1  | C1  |
| N2          | C5 | C5 | C12 | C4  | C3  |
| P1          | C5 | C5 | C12 | C13 | C13 |
| P2          | C1 | C8 | C12 | C13 | C9  |
| P3          | C2 | C5 | C12 | C13 | C13 |
| P4          | C6 | C5 | C11 | C13 | C10 |
| P5          | C3 | C5 | C12 | C13 | C9  |

be performed. With the Petri net, single cell trajectories can be simulated as follows: One token is put into a place defining the state in which the plasmodium is when the trajectory starts. The token is then allowed to move spontaneously through the net as enabled transitions fire randomly giving a simulated single cell trajectory for each simulation run. Simulations were performed with the Petri net tool [48, 57] (see Materials and Methods for details). Even without running a simulation, the Petri net visualizes the pathways that were taken by individual cells on their walk through the QPL (see Discussion) and it displays structural properties that are analysed in the following.

### 3.3. *T*-invariant analysis indicates cyclic transition between states

Before we assign the firing of the transitions to the differential regulation of specific genes, let us first consider some structural properties of the Petri net. We discuss the properties of the net in its current form, bearing in mind that its reconstruction is based on a limited amount of data. With more cells analysed, the net might well become more structured with more places and more transitions. Also, currently observed differences in trajectories between groups of cells (e.g. light-exposed vs. dark controls) might disappear with more cells analysed. Nevertheless, the currently available dataset allows to demonstrate the computational method.

The places in the Petri net of Fig. 2D have been purposefully arranged to visually assign them to the relative positions of the clusters within the MDS plot. In this format, the relative position of the places indicates, how similar the clusters are relative to each other with respect to the gene expression patterns they comprise. In order to arrange the net so that its structure appears more clearly, we used an automatic layout algorithm implemented in Snoopy (Fig. 4A). Although the connectivity within the re-arranged net is unchanged, the information regarding the similarity of the clusters is lost as the relative positions of the places is not preserved. The rearranged net was then used to analyse the *T*-invariants. A *T*-invariant can be described as follows: If each transition belonging to a *T*-invariant in partial order has fired once, the marking of the places of the *T*-invariant is the same as it was before the first transition of the *T*-invariant fired (see Fig. 7B which displays examples of *T*-invariants; for a formal definition of *T*-invariants see [58]). In other



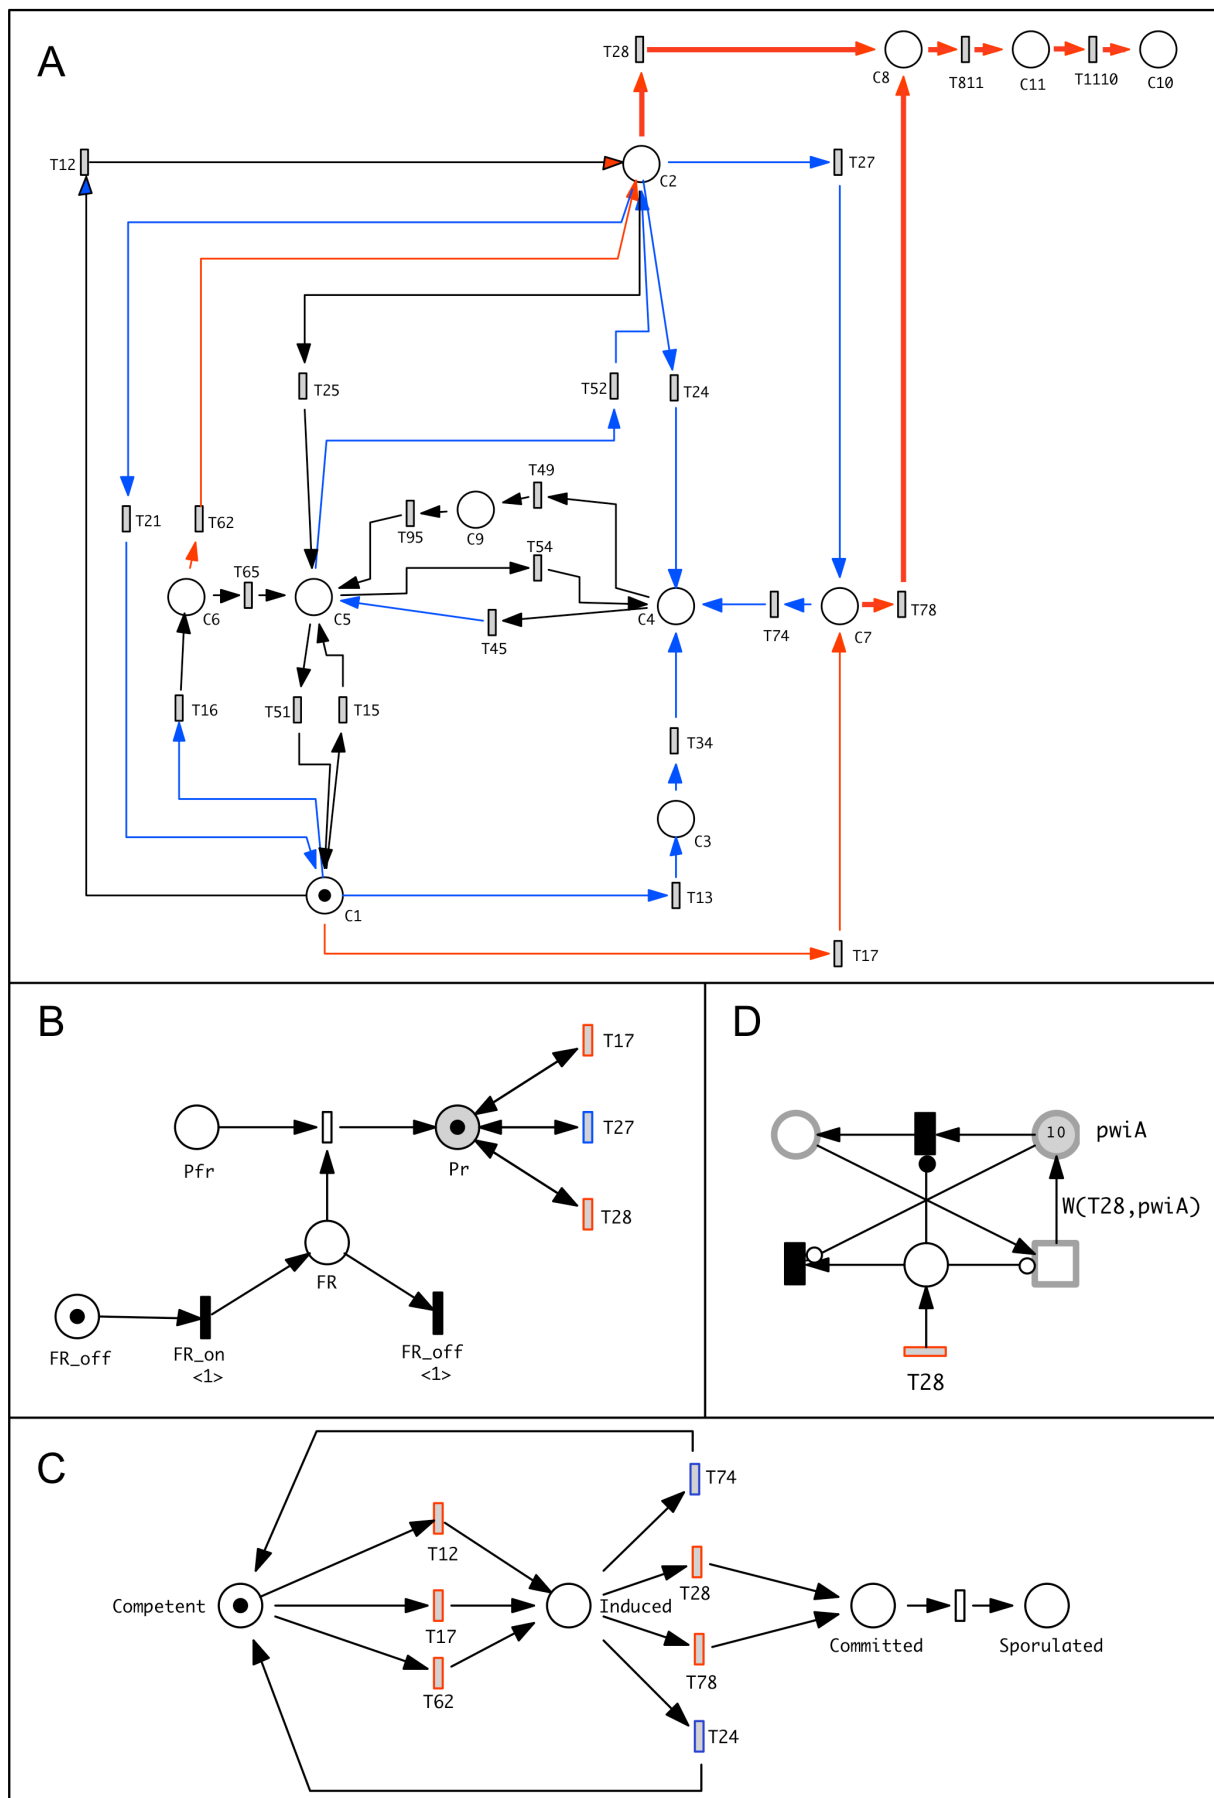

◀ **Figure 4.** Petri net model of state transitions of PHO3 cells, their sensory control, and the regulation of differentially expressed genes. Panels (A), (B), (C), and (D) show different, yet functionally coupled parts (modules) forming one coherent hybrid Petri net. The Petri net of Fig. 2C was subjected to an automatic layout algorithm (planarization) provided by Snoopy in order to get the graphical representation clearly arranged. The color coding of the arcs in (A) indicates in which types of plasmodial cells the paths were observed: Dark controls, not sporulated, black; far-red stimulated, not sporulated, blue; far-red stimulated, sporulated, red. The new layout was used to visualize the 31 T-invariants as calculated with the analysis tool Charlie (Supplemental Movie 1). Subsequently, all transitions ( $T_{12}$  to  $T_{1110}$ ) were defined as logic transitions (see Fig. 4d) to allow the connections to those parts of the model that were added to represent light regulation, differential gene expression, and the physiological states of the cell (B,C,D, respectively). (B) Phytochrome-mediated photosensory control of commitment, single cell trajectories, and change in gene expression levels. Places represent absence or presence of far-red light (FR) and the phytochrome photoreceptor in its  $P_{fr}$  and  $P_r$  states, respectively. Logic transitions are shaded in grey. Immediate transitions that fire without delay when the preplace is sufficiently marked, are shown in black [68]. (C) Physiological states of the plasmodium under sensory control and coupled to the transitions between the clusters in (A). (D) Sample copy of a gene expression module, updating the expression level of a gene upon firing of a transition linking the places representing clusters in (A). In contrast to the Petri net structures in (A), (B), and (C), this module occurs in multiple copies (= number of transitions in panel (A) x number of genes represented). Its structure is designed to update the expression level of a gene according to its x-fold change entered as an arc weight. Those places and transitions that perform a computational function only (and do not have any biological interpretation) have not been given a name. The network motif is triggered by one of the transitions in (A),  $T_{28}$ , in the example which is shown for the *pwiA* gene. As  $T_{28}$  fires, the expression level of the *pwiA* gene represented by the marking of the *pwiA* place is retrieved and updated according to the arc weight  $W(T_{28}, pwiA)$ . The arc weights for the set of analysed genes are displayed in Table 3 as x-fold changes in the gene expression level upon firing of transitions  $T_{28}$  and  $T_{78}$  which represent the commitment to sporulation. Supplementary Table 2 correspondingly displays the arc weights for all transitions of panel (A). Place representing the gene expression level are implemented and graphically displayed as continuous places [69] and can therefore be updated in the form of continuous numbers. As the Petri net contains stochastic and continuous nodes, it is called hybrid Petri net. Note that the gene expression modules are not more than entities that, in the context of the coherent model, phenotypically mimic and predict trajectories of differential gene expression but they do not represent any regulatory mechanism at the molecular level.

words, a T-invariant defines a reaction cycle or a sequence of firing events that brings the subsystem which is covered by this T-invariant back to its original state.

T-invariants were calculated using the analysis tool Charlie [49] (see Materials and Methods for details) and subsequently visualized in Snoopy. The net in Fig. 4A is mostly covered by a set of 31 T-invariants that display multiple overlaps. As overlapping is so extensive, color-coding of all individual T-invariants in the net of Fig. 4A is not even possible. As inspection of the individual T-invariants is instructive, the calculation of T-invariants with Charlie and visualization of the complete set is shown in the Supplemental

Movie SI Movie 1. T-invariants only occurred in those parts of the net that were reconstructed from the trajectories of cells that did not sporulate. Therefore, the red bold arcs in Fig. 4A (indicating the paths taken by the sporulated cells only) highlight those regions of the net that are not part of any of the 31 T-invariants. T-invariant analysis reflects that the non-sporulated cells cyclically switchend between different states of gene expression. It further predicts numerous trajectories that would emerge from the combinatorics of state transitions. From the color-encoded arcs in Fig. 4A it seems that far-red exposure created T-invariants in addition to those emerging from the trajectories of the dark controls. However, the low number of cells analysed for each group does not allow for any final conclusion. With this limitation in mind, the T-invariants involving C3 or C7 might well be stimulus-specific. T13, the transition from C1 to C3 with a strong differential regulation of *pikB*, *pldC* (down), and *pldA* (up) may indicate a futil attempt to switch to the cell fate of sporulation.

In summary, the high number of T-invariants reflects that non-sporulated PHO3 cells were switching between states of gene expression. Cells that sporulated in response to the far-red light stimulus irreversibly proceeded to clusters C8, C11 and C10, however on different pathways as seen in the Petri net and demonstrated by the experimental results shown in Table 1. The high number of T-invariants observed for PHO3 cells was not found in the PHO3+PHO57 heterokaryon indicating that the resulting topology of the quasipotential landscape is genotype-dependent (see below).

The trajectories of PHO3 cells that are committed to sporulation move through cluster C8 to clusters C11 or C10. In any temporal sequence of events, C8 was the first place which was visited by all cells that subsequently sporulated. Only cells that were committed to sporulation entered C8, suggesting that transitions T28 and T78 represent the committment to sporulation (Fig. 4C) where the system is trapped by a new basin of attraction.

### 3.4. Defining the light-dependent steps

Single cell trajectories have been obtained for three groups of cells, for far-red light-exposed cells that sporulated or that did not sporulate in response to the stimulus and for dark controls that did not sporulate either. Arcs representing trajectories taken by irradiated, not sporulating cells only are indicated in blue in Fig. 2D. However, due to the low number of samples it cannot be excluded that dark control cells would not take at

least certain steps of these pathways. Hence we searched for the minimal number of transitions that according to the net structure would be expected to be light-dependent. These are transitions T28 which, as discussed above, is directly associated with commitment to sporulation and T17 and T27 that both lead to C7. Accordingly, C7 is a candidate for a state of pre-activation which might either decay via T74 or lead to commitment via T78. Based on these considerations, the minimal model for light activation is shown in Fig. 4B. The phytochrome photoreceptor is activated by photoconversion of its initial, far-red light-absorbing state  $P_{fr}$  to  $P_r$ .  $P_r$  then enables the logic transitions T17, T27, and T28, meaning that the three transition cannot fire without any far-red light stimulus. Coupled through so-called logic transitions, highlighted in grey, the light-activation module of Fig. 4B is a functional part of the Petri net of Fig. 4A. Graphical copies of a place or a transition are called logic places or logic transitions. The principle is explained in Fig. 3c,d. The use of logic nodes (logic places and/or logic transitions) allows to structure and to modularize the graphical appearance of the Petri net having one part that models the MDS results and simulates the single cell trajectories (Fig. 4A) and other functionally coupled but graphically separate modular parts that model molecular events, photoreceptor activation, or changes in the physiological state of the cell in response to the photoactivation of the phytochrome (Figs. 4B,C). Fig. 4D shows a yet other part that occurs in multiple copies each of which is modelling the differential regulation of a specific gene.

### 3.5. Commitment of PHO3 plasmodia occurred through alternative trajectories (pathways)

In sporulating PHO3 cells or in PHO3 cells committed to sporulation the expression level of *psgA*, *pldC*, *pldB*, *pikB*, *pumA*, and *anxA* was low while it was high for *pptA*, *cdcA*, *pakA*, *pldA*, *ligA*, *pwiA*, and *rgsA*. For simplicity, we will call the two sets of genes as up-regulated or down-regulated in the following. The differential regulation of the two sets is similar as in the wild-type and is seen for clusters C8, C10, and C11 in the heat map in Fig. 2A. Noteworthy, clusters C8, C10, and C11 only contain data from sporulated cells. Cluster C9 displays expression levels that are qualitatively similar to C8, C10, and C11, however the down-regulation of some of the genes is not as pronounced. Interestingly,

one of the dark control cells assumed this expression pattern for several hours but then switched to C5 (Table 2) and the cell did not sporulate. In order to roughly characterize the expression patterns assigned to the Petri net places, the other clusters according to the heat map of Fig. 2A may be described as follows: In clusters C1, C2, C3, and C6 both, down- and up-regulated genes are low. In clusters C4 and C5, most of the down- and up-regulated genes are at intermediate level. In C7, the genes of the two groups are moderately high. Commitment of the cells to sporulation was associated with switching from C2 (up- and down-regulated genes low) or from C7 (up- and down-regulated genes moderately high) to C8. Accordingly, cells proceeded to commitment to sporulation on two qualitatively alternative ways, through up-regulating the up-regulated genes (T28 of the Petri in Fig. 4A) net or through down-regulating the down-regulated genes (T78). The final result was the same in both cases: up-regulated genes high and down-regulated genes low.

### *3.6. Formal assignment of the transition between clusters to the differential regulation of specific genes*

The Petri net in Figs. 2D and 4A models how the collective state of a cell may change with time depending on whether or not the cell has received a light stimulus. However, the Petri net is solely referring to the states as defined by gene expression patterns discretized by clustering. In order to consider the differential regulation of specific genes upon the transition from one state to another, we calculated how much the mean value of the expression level for each considered gene differed upon the observed transitions between clusters (Supplementary Table 2). This yielded for each transition of the Petri net of Fig. 2D the x-fold change in the expression level of each gene that occurs upon firing of the transition. These values are used as arc weights in the gene expression modules of the Petri net. There are multiple copies of the gene expression module shown in Fig. 4D which are used to update the expression-level of each considered gene upon firing of each of the Petri net transitions of Fig. 3 (see legend to figure Fig. 4D for structural details of the Petri net module). The expression level of genes in terms of relative mRNA concentration is represented by the number of tokens in the place for its gene-specific mRNA. As each transition from one cluster to another is associated with the differential regulation of quite a number of genes we use logic transitions and logic

**Table 3.** Differential gene expression associated with the commitment to sporulation of PHO3 cells. The x-fold changes in gene expression associated to firing of transitions T28 and T78 in the Petri net of Fig. 4 were calculated by taking the means of the expression values of each gene in the two clusters that were compared. The values for T28 and for T78 were then sorted for ascending x-fold changes. In the Petri net of Fig. 4, the arc weight  $W(Tx,genX)$  entered into each gene expression module (Fig. 4D) corresponds to the x-fold change of each gene for the respective transition as it is provided by this table. The x-fold changes of gene expression values for all transitions of the Petri net of Fig. 4A is provided as Supplementary Table 1.

| <b>T28</b> |                 | <b>pIdC</b>   | <b>pikB</b>   | <b>pumA</b>   | <b>psgA</b>  | <b>pIdB</b>  | <b>anxA</b>  | <b>pakA</b>  | <b>cdcA</b>  | <b>ligA</b>   | <b>rgsA</b>   | <b>pwiA</b>   | <b>pptA</b>   | <b>pIdA</b>    |
|------------|-----------------|---------------|---------------|---------------|--------------|--------------|--------------|--------------|--------------|---------------|---------------|---------------|---------------|----------------|
| Cluster 2  | Mean            | 0.707         | 0.057         | 0.270         | 0.173        | 0.298        | 0.101        | 0.921        | 0.462        | 0.114         | 0.153         | 0.107         | 0.086         | 0.043          |
| Cluster 8  | Mean            | 0.042         | 0.045         | 0.309         | 0.206        | 0.874        | 0.514        | 5.194        | 3.782        | 1.396         | 4.033         | 3.378         | 3.477         | 14.261         |
|            | Delta           | -0.665        | -0.013        | 0.038         | 0.033        | 0.576        | 0.413        | 4.273        | 3.320        | 1.282         | 3.880         | 3.271         | 3.391         | 14.218         |
| W(T28)     | <b>x-fold</b>   | <b>0.059</b>  | <b>0.777</b>  | <b>1.141</b>  | <b>1.191</b> | <b>2.929</b> | <b>5.103</b> | <b>5.641</b> | <b>8.183</b> | <b>12.211</b> | <b>26.366</b> | <b>31.686</b> | <b>40.300</b> | <b>333.887</b> |
|            | <b>1/x-fold</b> | <b>16.897</b> | <b>1.287</b>  | <b>0.876</b>  | <b>0.839</b> | <b>0.341</b> | <b>0.196</b> | <b>0.177</b> | <b>0.122</b> | <b>0.082</b>  | <b>0.038</b>  | <b>0.032</b>  | <b>0.025</b>  | <b>0.003</b>   |
| <b>T78</b> |                 | <b>pIdC</b>   | <b>pikB</b>   | <b>psgA</b>   | <b>pumA</b>  | <b>anxA</b>  | <b>pIdB</b>  | <b>ligA</b>  | <b>cdcA</b>  | <b>rgsA</b>   | <b>pakA</b>   | <b>pIdA</b>   | <b>pptA</b>   | <b>pwiA</b>    |
| Cluster 7  | Mean            | 1.736         | 1.192         | 2.925         | 1.688        | 2.201        | 3.118        | 2.434        | 4.136        | 3.468         | 2.809         | 5.241         | 1.244         | 0.776          |
| Cluster 8  | Mean            | 0.042         | 0.045         | 0.206         | 0.309        | 0.514        | 0.874        | 1.396        | 3.782        | 4.033         | 5.194         | 14.261        | 3.477         | 3.378          |
|            | Delta           | -1.695        | -1.148        | -2.719        | -1.379       | -1.687       | -2.244       | -1.038       | -0.354       | 0.565         | 2.385         | 9.020         | 2.234         | 2.602          |
| W(T78)     | <b>x-fold</b>   | <b>0.024</b>  | <b>0.037</b>  | <b>0.070</b>  | <b>0.183</b> | <b>0.233</b> | <b>0.280</b> | <b>0.574</b> | <b>0.914</b> | <b>1.163</b>  | <b>1.849</b>  | <b>2.721</b>  | <b>2.796</b>  | <b>4.352</b>   |
|            | <b>1/x-fold</b> | <b>41.490</b> | <b>26.782</b> | <b>14.199</b> | <b>5.466</b> | <b>4.284</b> | <b>3.567</b> | <b>1.743</b> | <b>1.094</b> | <b>0.860</b>  | <b>0.541</b>  | <b>0.368</b>  | <b>0.358</b>  | <b>0.230</b>   |

places for the gene-specific mRNAs to graphically disentangle the network in order to avoid a confusing crisscross of arcs. The model is constructed based on the x-fold changes in the expression level of each gene that occurs during switching between clusters as listed in Table 3. By employing gene expression modules in the described form, we obtain not more than a formal model of the phenotype of a cell rather than a mechanistic model representing molecular causality. Nevertheless we suggest that the phenotype model is useful as it predicts possible single cell trajectories, decomposes complex phenotypes in a formalized manner (Table 3), and therefore may serve as a scaffold for the computational inference of a model of the molecular causality directly from experimental data [59, 60] (see Discussion).

### *3.7. Light responsiveness and single cell trajectories are genotype-dependent*

Cells of strain PHO57 do not sporulate in response to a far-red light stimulus which would be saturating in the wild type [45]. When PHO57 cells were stimulated with far-red light, there was no obvious response in differential gene expression (Fig. 5). Likewise, the MDS analysis of the gene expression data revealed data points in one significant cluster with three outliers that mapped to a second cluster, suggesting that the far-red light exposure did not induce any significant response at the transcriptional level.

Heterokaryons of equal relative cytoplasmic mass of PHO57 and PHO3 were obtained by fusing plasmodial cells of both strains. Accordingly, the PHO3 and PHO57 mutant gene dosages were approximately 50 % in the heterokaryon in the presence of a dosage of 50 % of the corresponding genes of the respective fusion partner, which may be complementing (wild-type) alleles. The heterokaryons showed a qualitatively similar phenotype as PHO3 cells. As in PHO3, only approximately 50 % of the plasmodial cells of the PHO57 + PHO3 heterokaryon population sporulated in response to a saturating far-red light stimulus, suggesting that the PHO57 mutation in conjunction with PHO3 is recessive at a gene dosage of 50 %. Sporulated cells qualitatively showed a similar response at the gene expression level (Fig. 6A) as PHO3 cells did, i.e. down-regulation of *psgA*, *pldC*, *pldB*, *pikB*, *pumA*, *anxA* and up-regulation of *pptA*, *cdcA*, *pakA*, *pldA*, *ligA*, *pwiA*, and *rgsA*. However, the ways in which differential regulation occurred were

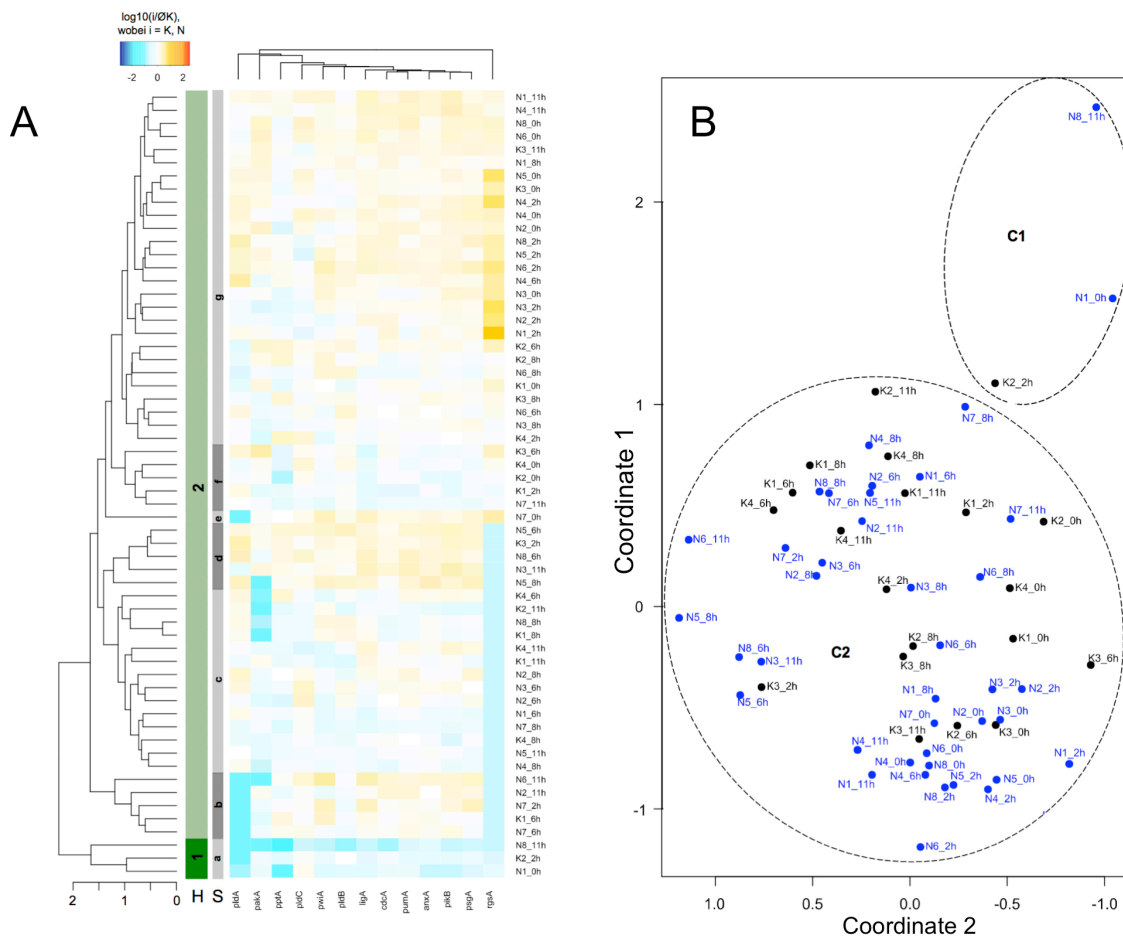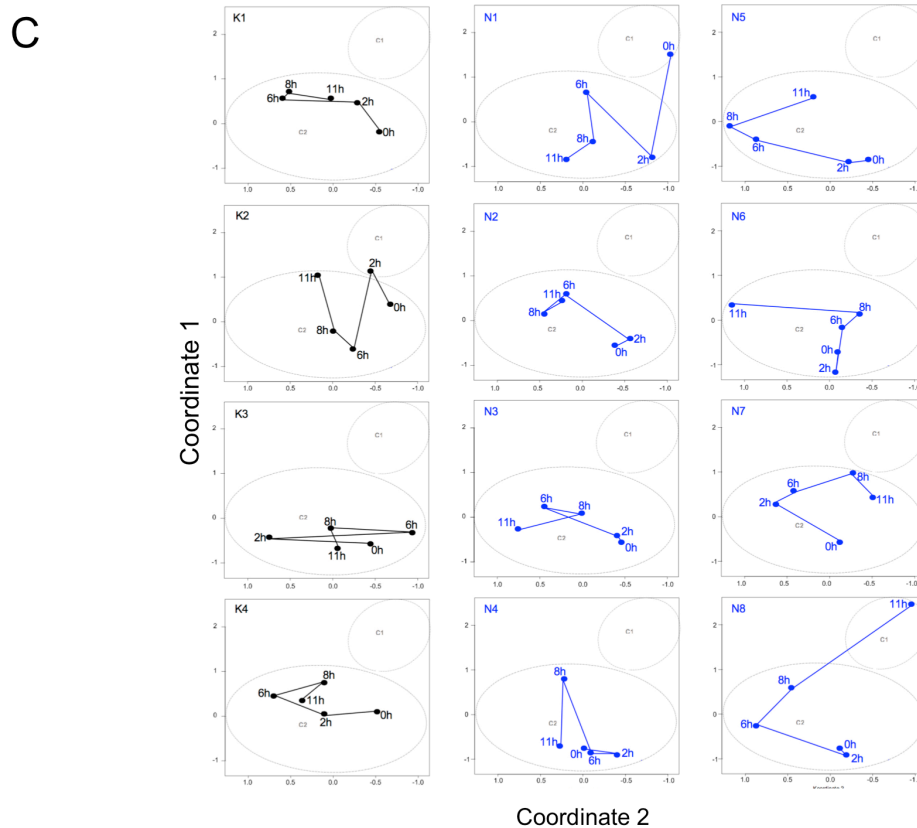



◀ **Figure 5.** Statistical analysis of single cell trajectories of plasmodial cells of strain PHO57. Color coding of trajectories in (C): not stimulated, not sporulated, black; far-red light stimulated, not sporulated, blue. For further details see legend to Fig. 2.

different in the PHO57 + PHO3 heterokaryon as compared to PHO3 and to PHO57 cells. In the heterokaryon, there were 13 significant clusters to which the data points in the MDS plot were assigned by hierarchical clustering (Fig. 6B). Again, the single cell trajectories revealed variable pathways for individual cells (Fig. 6C). However, the Petri net reconstructed from the pathways of cells of the heterokaryon Fig. 6D was different as compared to the Petri net for the PHO3 cells with its 31 T-invariants. In the Petri net for the heterokaryon there were only two T-invariants, one for light-exposed cells that did not sporulate and one for the cells of the dark controls (Fig. 7). The other pathways lead to sporulation. There were two nodes of pre-activation for sporulating cells, C5 and C12 from which cells could return without sporulating. And there was one central node C13 for all sporulating cells which characterizes a state at which the cells had been committed to sporulation. The difference in the number of T-invariants indicates that the behaviour of the cells of the PHO3+PHO57 heterokaryon is more directed than the behaviour of the PHO3 cells suggesting that the topology of the QPL is genotype-dependent. This more directed behaviour with less T-invariants within the Petri net may well be due to partial complementation of the sporulation-suppressing PHO3 mutation by the wild type gene product contributed by the PHO57 plasmodium in the heterokaryon.

## 4. Discussion and Conclusions

### 4.1. Petri net representation of single cell trajectories

We have analysed differential gene expression in individual *Physarum polycephalum* plasmodia that were exposed to a differentiation-inducing far-red light stimulus pulse by repeatedly taking samples from the same plasmodial cells. MDS analysis revealed that data points were not evenly spread over the plot but formed clouds, with different patterns obtained for cells with different genotype. Connecting data points from single cell time series showed that cells followed different trajectories in the MDS plot in switching

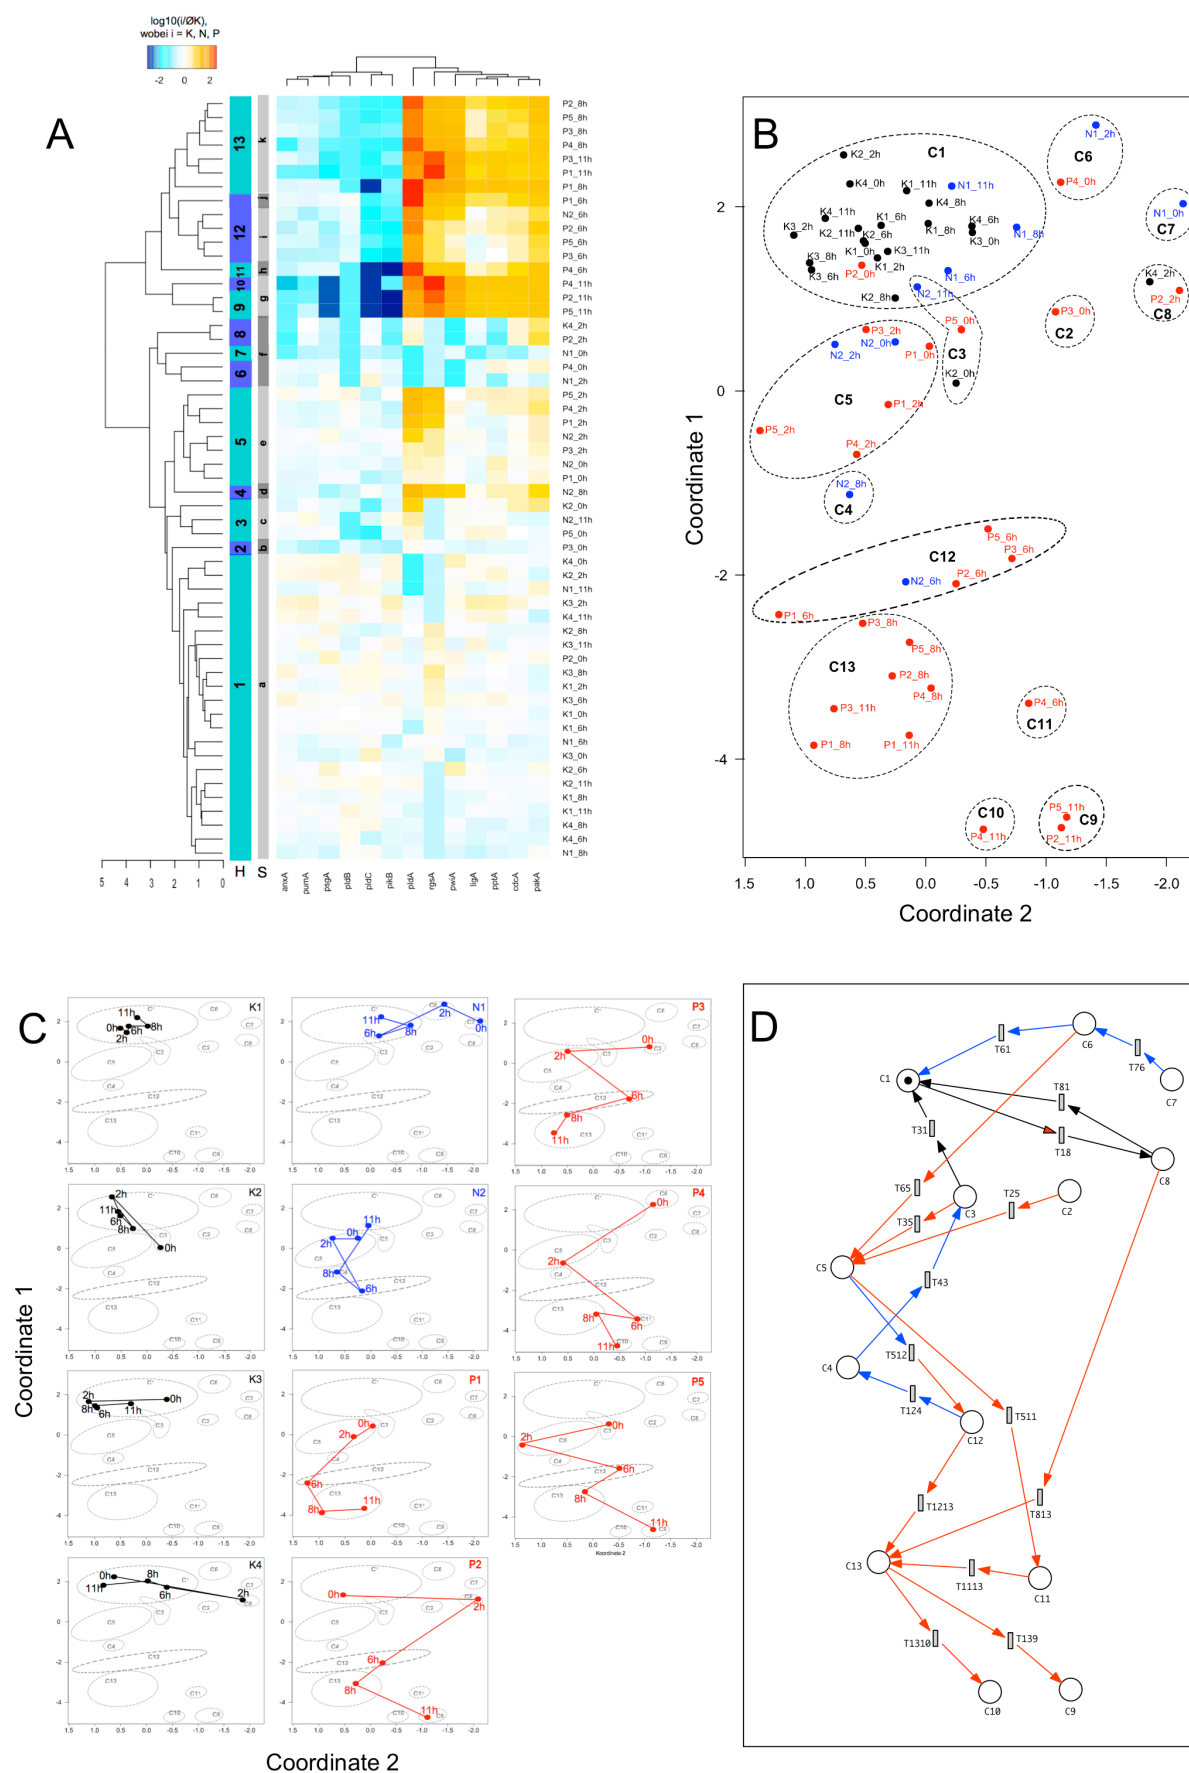

◀ **Figure 6.** Statistical analysis and Petri net model of single cell trajectories of plasmodial cells of the heterokaryon PHO3+PHO57. Color coding of trajectories in (C) and Petri net arcs in (D): not stimulated, not sporulated, black; far-red light stimulated, not sporulated, blue; far-red light stimulated, sporulated, red. For further details see legend to Fig. 2.

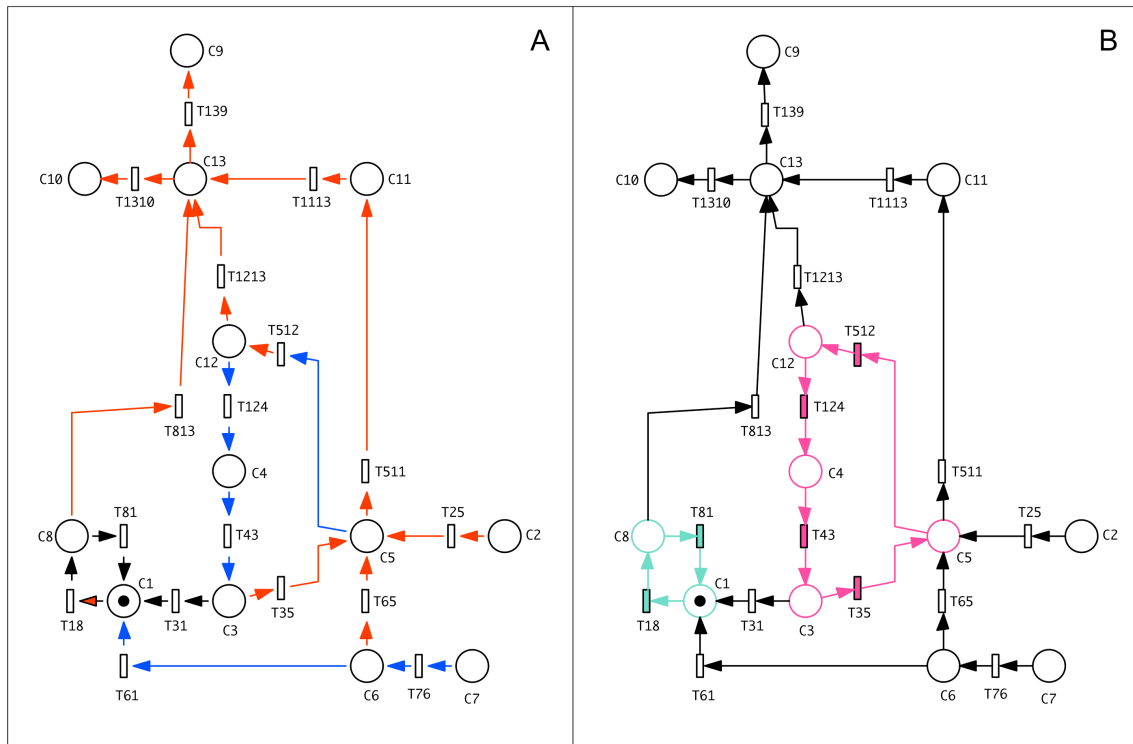

**Figure 7.** Petri net of Fig. 6D of cells of the PHO3 + PHO57 heterokaryon rearranged by an automatic layout algorithm (planarization) provided by Snoopy. (A) Color coding of the arcs representing trajectories of cells (not stimulated, not sporulated, black; far-red light stimulated, not sporulated, blue; far-red light stimulated, sporulated, red). (B) Same net with the two T-invariants as identified by the analysis tool Charlie highlighted in green and purple.

between clouds of data points. These trajectories obviously differed between cells that had or had not been exposed to far-red light and that sporulated or did not sporulate in response to the light stimulus. Although cells responded to a stimulus and eventually were committed to sporulation, their response in terms of differential gene expression was obviously different between individual plasmodial cells, as it was previously reported for the wild type [29]. Again, this behaviour was genotype-dependent, as in the non-

sporulating mutant PHO57 trajectories of stimulated and not stimulated cells could not even be discriminated.

Hierarchical clustering of the data points obtained for the cells of each genotype, PHO3, PHO57, and PHO3+PHO57 heterokaryon, identified significantly different clusters in each of the sets. These clusters mapped to corresponding clouds of data points in the MDS plot, confirming that both statistical methods delivered consistent results and assigning discretized states of gene expression to the clouds of data points in the MDS plot. Based on the discretized states, single cell trajectories were re-evaluated for their time-dependent switching between clusters. From this data set and from averaged differences in gene expression between clusters we directly reconstructed Petri net models that predict single cell trajectories and spontaneous or light-induced changes in gene expression of sporulating and not sporulating cells.

In order to discuss the biological relevance of our Petri net models, a couple of points should be mentioned. First of all, this type of Petri net is a phenotype model. It abstracts, mimics, and predicts the discretized behaviour of the cells in terms of spontaneous and stimulus-induced gene expression and the associated commitment to sporulation. Clearly, it is not a model that explains the cellular behaviour based on causal molecular mechanisms. However, it makes a systems-oriented, formalized approach to the analysis and decomposition of complex phenotypes, and the model may therefore be useful as a scaffold to reverse engineer the underlying network of molecular mechanisms.

Another critical point that should be mentioned is that the data sets that were available to construct the Petri net models are still small. With more data analysed the number of clusters and hence the number of places in the Petri net might change and the number of transitions might become larger. Hence the Petri nets shown here just reflect the data sets as they currently are but do provide a proof-of-principle for the Petri net based computational approach.

#### *4.2. How does the Petri net model relate to the quasipotential landscape?*

There are two basic and potentially complementing approaches in systems biology [61]. Bottom-up and top-down modeling. In the first case, models are built from known molecular interactions. In the second approach, also called reverse engineering or network inference, the model of the network is reconstructed based on experimental

data. In principle, the quasipotential landscape controlling the differentiation of individual cells could be calculated from a set of differential equations describing the biochemical reactions within the regulatory network [6, 62]. However, such a model is currently not available for sporulation of the *Physarum* plasmodium and information about the gene regulatory network is only sketchy at best for mammalian cells [62]. Computational analysis of known networks or network motifs has shown that their dynamic behaviour depends on mechanistic details, kinetic rate constants, and concentrations [63-66]. Given this situation and considering the complexity of cellular signaling, the reverse engineering (network inference) approach to complex processes like cell fate decisions may be a useful complement to bottom-up research. Hence, we wish to explore ways to reconstruct the quasipotential landscape from experimental time series data.

Can a Petri net as a predictive model for single cell trajectories be helpful to retrieve information about the Waddington quasipotential landscape? As biochemical reactions are driven by differences in the chemical potential, statistically significant different single cell trajectories of measured observables (like mRNA concentrations or changes in the abundance or covalent modification of proteins) will ultimately reflect differences in causal mechanisms or processes that influence these observables. The clouds of data points in the MDS plots indicate states of the system that are likely while the white regions indicate states that are less likely and the density of data points, at high sample size, is a measure of the likeliness that the system adopts a certain state. In this work, such relatively likely states have been discretized by hierarchical clustering and modeled as places of a Petri net as shown by the cartoon of Fig. 8. The probabilities that the system transits from one state to the other can be encoded as rate constants assigned to stochastic Petri net transitions. Hence, we assume that single cell trajectories, e.g. as projected into the plane of an MDS plot or as predicted by a corresponding Petri net model, do reflect pathways that are taken through the QPL. Accordingly, we propose that the Petri nets of Fig. 2D and Fig. 6D as executable models do reflect aspects of the structures and dynamics of the QPL of a cell of a given genotype. As indicated by the dynamic behaviour and by the T-invariants of the Petri nets derived for strain PHO3 and for the PHO3+PHO57 heterokaryon, the system can transit between certain states that are meta-stable or even stable. At least some of these states may correspond to basins of attraction. Upon photo-stimulation, stimulus-dependent Petri net transitions are enabled, as the topology of the QPL has changed and the system now moves to a new basin of attraction through states indicated by the Petri net places. Accordingly, responsiveness of the topology of the QPL to differentiation-inducing stimuli in the Petri

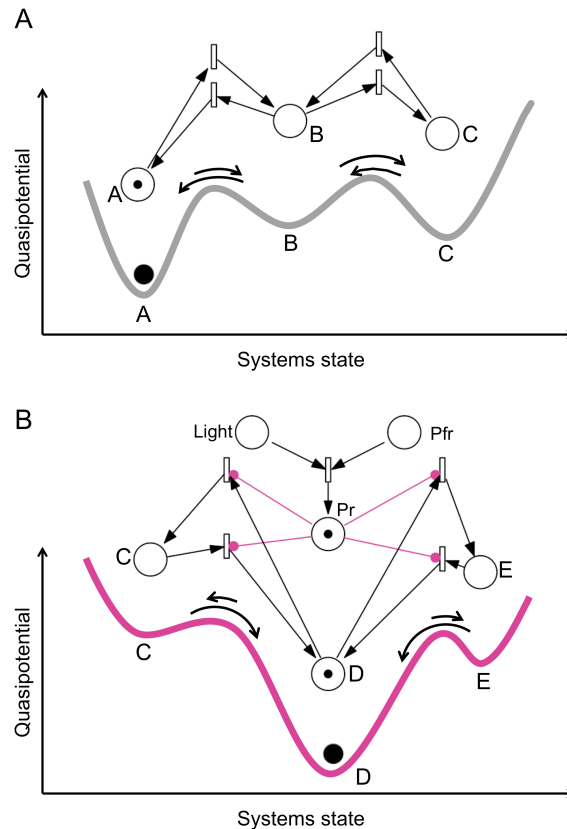

**Figure 8.** Interpretation of Petri net places and transitions in the context of the Waddington quasipotential landscape. The cartoon suggests that some of the places of the Petri nets of Figs. 2D and 6D may represent states of gene expression (represented by the marble and the token) that correspond or lead to basins of attraction of the Waddington quasipotential landscape. Upon light stimulation, the topology of the quasipotential landscape of unstimulated cells (A) is remodeled (B) so that the system is exposed to new basin(s) of attraction. This might occur when photoactivation of the phytochrome photoreceptor alters certain steady states within the regulatory network.

net framework is modeled in the form of specific transitions that, if enabled, allow the system to proceed to a new state of attraction.

## Acknowledgments

B.W. was supported by the state of Saxony-Anhalt through the International Max Planck Research School for Advanced Methods in Process and Systems Engineering, Magdeburg.

## References

- [1] Waddington C H 1957 *The Strategy of the Genes; a Discussion of Some Aspects of Theoretical Biology*. (London: Allen & Unwin)
- [2] Huang S, Ernberg I and Kauffman S 2009 Cancer attractors: a systems view of tumors from a gene network dynamics and developmental perspective *Semin Cell Dev Biol* **20** 869-76
- [3] Kauffman S A 1969 Metabolic stability and epigenesis in randomly constructed genetic nets *J. Theor. Biol.* **22** 437-67
- [4] Kauffman S A 1969 Homeostasis and differentiation in random genetic control networks *Nature* **224** 177-8
- [5] Kauffman S A 1993 *The origins of order* (New York: Oxford University Press)
- [6] Wang J, Zhang K, Xu L and Wang E 2011 Quantifying the Waddington landscape and biological paths for development and differentiation *Proc. Nat. Acad. Sci. USA* **108** 8257-62
- [7] Zhou J X, Aliyu M D S, Aurell E and Huang S 2012 Quasi-potential landscape in complex multi-stable systems *Journal of the Royal Society, Interface / the Royal Society* **9** 3539-53
- [8] Ferrell Jr J E 2012 Bistability, bifurcations, and Waddington's review epigenetic landscape *Current Biology* **22** R458-R66
- [9] Arkin A, Ross J and McAdams H H 1998 Stochastic kinetic analysis of developmental pathway bifurcation in phage lambda-infected *Escherichia coli* cells *Genetics* **149** 1633-48
- [10] Gardner T S, Cantor C R and Collins J J 2000 Construction of a genetic toggle switch in *Escherichia coli* *Nature* **403** 339-42
- [11] Li S, Brazhnik P, Sobral B and Tyson J J 2008 A quantitative study of the division cycle of *Caulobacter crescentus* stalked cells *PLoS Computational Biology* **4** e9
- [12] Oppenheim A B, Kobilier O, Stavans J, Court D L and Adhya S 2005 Switches in bacteriophage lambda development. *Annual Review of Genetics* **39** 409-29
- [13] Pomerening J R, Sontag E D and Ferrell J E 2003 Building a cell cycle oscillator: hysteresis and bistability in the activation of Cdc2 *Nature Cell Biology* **5** 346-51
- [14] Schultz D, Wolynes P G, Ben Jacob E and Onuchic J N 2009 Deciding fate in adverse times: sporulation and competence in *Bacillus subtilis* *Proc. Nat. Acad. Sci. USA* **106** 21027-34
- [15] Süel G M, Garcia-Ojalvo J, Liberman L M and Elowitz M B 2006 An excitable gene regulatory circuit induces transient cellular differentiation *Nature* **440** 545-50
- [16] Tyson J J, Chen K C and Novák B 2003 Sniffers, buzzers, toggles and blinkers: dynamics of regulatory and signaling pathways in the cell *Current Opinion in Cell Biology* **15** 221-31
- [17] Tyson J J and Novak B 2014 Control of cell growth, division and death: information processing in living cells *Interface Focus* **4** 20130070

- [18] Tyson J J and Novák B 2010 Functional Motifs in Biochemical Reaction Networks *Annual Review of Physical Chemistry* **61** 219-40
- [19] Zachariae W and Tyson J J 2016 Cell Division: Flipping the Mitotic Switches *Current Biology* **26** R1272-R4
- [20] Huang S, Guo Y-P, May G and Enver T 2007 Bifurcation dynamics in lineage-commitment in bipotent progenitor cells *Developmental Biology* **305** 695-713
- [21] Enver T, Pera M, Peterson C and Andrews P W 2009 Stem cell states, fates, and the rules of attraction *Cell Stem Cell* **4** 387-97
- [22] Graf T and Enver T 2009 Forcing cells to change lineages *Nature* **462** 587-94
- [23] Wang J, Xu L, Wang E and Huang S 2010 The potential landscape of genetic circuits imposes the arrow of time in stem cell differentiation *Biophys J* **99** 29-39
- [24] Chen C, Baumann W T, Xing J, Xu L, Clarke R and Tyson J J 2014 Mathematical models of the transitions between endocrine therapy responsive and resistant states in breast cancer *Journal of The Royal Society Interface* **11** 20140206
- [25] Bargaje R, Trachana K, Shelton M N, McGinnis C S, Zhou J X, Chadick C, Cook S, Cavanaugh C, Huang S and Hood L 2017 Cell population structure prior to bifurcation predicts efficiency of directed differentiation in human induced pluripotent cells *Proc. Nat. Acad. Sci. USA* **114** 2271-6
- [26] Wu F, Su R Q, Lai Y C and Wang X 2017 Engineering of a synthetic quadrastable gene network to approach Waddington landscape and cell fate determination *eLife* **6** e23702
- [27] Zhou J X, Isik Z, Xiao C, Rubin I, Kauffman S A, Schroeder M and Huang S 2016 Systematic drug perturbations on cancer cells reveal diverse exit paths from proliferative state. *Oncotarget* **7** 7415-25
- [28] Solnica-Krezel L, Burland T G and Dove W F 1991 Variable pathways for developmental changes of mitosis and cytokinesis in *Physarum polycephalum* *The Journal of Cell Biology* **113** 591-604
- [29] Rätzel V and Marwan W 2015 Gene expression kinetics in individual plasmodial cells reveal alternative programs of differential regulation during commitment and differentiation *Develop. Growth Differ.* **57** 408–20
- [30] Sauer H W, Babcock K L and Rusch H P 1969 Sporulation in *Physarum polycephalum*. A model system for studies on differentiation *Exp. Cell Res.* **57** 319-27
- [31] Guttus E and Guttus S 1961 Synchronous mitosis in starved plasmodia of the myxomycete *Physarum polycephalum* *Federation Proceedings* **20** 419
- [32] Guttus E and Guttus S 1964 Mitotic synchrony in the plasmodia of *Physarum polycephalum* and mitotic synchronisation by coalescence of microplasmodia *Meth. Cell Physiol.* **1** 43-54
- [33] Rusch H P, Sachsenmaier W, Behrens K and Gruter V 1966 Synchronization of mitosis by the fusion of the plasmodia of *Physarum polycephalum* *J. Cell Biol.* **31** 204-9
- [34] Sachsenmaier W, Remy U and Plattner-Schobel R 1972 Initiation of synchronous mitosis in *Physarum polycephalum* *Exp. Cell Res.* **73** 41-8



- [35] Starostzik C and Marwan W 1995 Functional mapping of the branched signal transduction pathway that controls sporulation in *Physarum polycephalum* *Photochem. Photobiol.* **62** 930-3
- [36] Walter P, Hoffmann X-K, Ebeling B, Haas M and Marwan W 2013 Switch-like reprogramming of gene expression after fusion of multinucleate plasmodial cells of two *Physarum polycephalum* sporulation mutants *Biochemical and Biophysical Research Communications* **435** 88-93
- [37] Starostzik C and Marwan W 1995 A photoreceptor with characteristics of phytochrome triggers sporulation in the true slime mould *Physarum polycephalum* *FEBS Lett.* **370** 146-8
- [38] Lamparter T and Marwan W 2001 Spectroscopic detection of a phytochrome-like photoreceptor in the myxomycete *Physarum polycephalum* and the kinetic mechanism for the photocontrol of sporulation by P<sub>fr</sub> *Photochem. Photobiol.* **73** 697-702
- [39] Schaap P, *et al.* 2016 The *Physarum polycephalum* genome reveals extensive use of prokaryotic two-component and metazoan-type tyrosine kinase signaling *Genome Biol. Evol.* **8** 109-25
- [40] Barrantes I, Glöckner G, Meyer S and Marwan W 2010 Transcriptomic changes arising during light-induced sporulation in *Physarum polycephalum* *BMC Genomics* **11** 115
- [41] Barrantes I, Leipzig J and Marwan W 2012 A next-generation sequencing approach to study the transcriptomic changes during the differentiation of *Physarum* at the single-cell level *Gene Regulation and Systems Biology* **6** 127-37
- [42] Martel R, Tessier A, Pallotta D and Lemieux G 1988 Selective gene expression during sporulation of *Physarum polycephalum* *J. Bacteriol.* **170** 4784-90
- [43] Putzer H, Verfuether C, Claviez M and Schreckenbach T 1984 Photomorphogenesis in *Physarum*: Induction of tubulins and sporulation-specific proteins and of their mRNAs *Proc. Natl. Acad. Sci. USA* **81** 7117-21
- [44] Sujatha A, Balaji S, Devi R and Marwan W 2005 Isolation of *Physarum polycephalum* plasmodial mutants altered in sporulation by chemical mutagenesis of flagellates *Eur. J. Protistol.* **41** 19-27
- [45] Rätzel V, Ebeling B, Hoffmann X K, Tesmer J and Marwan W 2013 *Physarum polycephalum* mutants in the photocontrol of sporulation display altered patterns in the correlated expression of developmentally regulated genes *Develop. Growth Differ.* **55** 247-59
- [46] Hoffmann X-K, Tesmer J, Souquet M and Marwan W 2012 Futile attempts to differentiate provide molecular evidence for individual differences within a population of cells during cellular reprogramming *FEMS Microbiology Letters* **329** 78-86
- [47] Clarke K, Somerfield P and Gorley R 2008 Testing of null hypotheses in exploratory community analyses: similarity profiles and biota-environment linkage *Journal of Experimental Marine Biology and Ecology* **366** 56-69

- [48] Heiner M, Herajy M, Liu F, Rohr C and Schwarick M 2012 Snoopy – a unifying Petri net tool. In: *PETRI NETS 2012*: Springer) pp 398–407
- [49] Heiner M, Schwarick M and Wegener J 2015 Charlie – an extensible Petri net analysis tool. In: *36th International Conference, PETRI NETS 2015*, ed R Devillers and A Valmari (Brussels: Springer) pp 200-11
- [50] Murtagh F 1985 Multidimensional clustering algorithms *COMPSTAT Lectures 4*
- [51] Borg I and Groenen P 2005 *Modern Multidimensional Scaling- Theory and Applications* (New York: Springer)
- [52] Reisig W 2013 *Understanding Petri Nets. Modeling Techniques, Analysis Methods, Case Studies* (Berlin: Springer-Verlag)
- [53] Heiner M, Gilbert D and Donaldson R 2008 *SFM 2008*, ed M Bernardo, *et al.*: Springer) pp 215-64
- [54] Pinney J W, Westhead R D and McConkey G A 2003 Petri Net representations in systems biology *Biochem. Soc. Trans.* **31** 1513-5
- [55] Marwan W, Sujatha A and Starostzik C 2005 Reconstructing the regulatory network controlling commitment and sporulation in *Physarum polycephalum* based on hierarchical Petri net modeling and simulation *J. Theor. Biol.* **236** 349-65
- [56] Jensen K and Kristensen L M 2009 *Coloured Petri Nets. Modelling and Validation of Concurrent Systems* (Berlin: Springer)
- [57] Rohr C, Marwan W and Heiner M 2010 Snoopy--a unifying Petri net framework to investigate biomolecular networks *Bioinformatics* **26** 974-5
- [58] Heiner M 2009 *Algorithmic Bioprocesses*, ed A e a Condon (Berlin, Heidelberg: Springer-Verlag) pp 367-89
- [59] Durzinsky M, Wagler A and Marwan W 2011 Reconstruction of extended Petri nets from time series data and its application to signal transduction and to gene regulatory networks *BMC Systems Biology* **5** 113
- [60] Durzinsky M, Marwan W and Wagler A 2013 Reconstruction of extended Petri nets from time-series data by using logical control functions *Journal of Mathematical Biology* **66** 203-23
- [61] Hecker M, Lambeck S, Toepfer S, Van Someren E and Guthke R 2009 Gene regulatory network inference: data integration in dynamic models-a review *BioSystems* **96** 86-103
- [62] Zhou J X, Aliyu M D S, Aurell E and Huang S 2012 Quasi-potential landscape in complex multi-stable systems *Journal of The Royal Society Interface* **9** 3539-53
- [63] Endres R G 2012 Signaling crosstalk: New insights require new vocabulary *Biophysical Journal* **103** 2241-2
- [64] Rowland M A, Fontana W and Deeds E J 2012 Crosstalk and competition in signaling networks. *Biophysical Journal* **103** 2389-98

- [65] Varusai T M, Kolch W, Kholodenko B N and Nguyen L K 2015 Protein–protein interactions generate hidden feedback and feed-forward loops to trigger bistable switches, oscillations and biphasic dose–responses *Molecular BioSystems* **11** 2750-62
- [66] Vilar J M G, Guet C C and Leibler S 2003 Modeling network dynamics: the lac operon, a case study *The Journal of Cell Biology* **161** 471-6
- [67] Dee J 1987 Genes and development in *Physarum* *Trends Genet.* **3** 208-13
- [68] Marwan W, Rohr C and Heiner M 2012 *Methods in Molecular Biology*, ed J van Helden, *et al.* (Clifton, NJ: Humana Press) pp 409-37
- [69] Blätke M A, Heiner M and Marwan W 2015 *Algebraic and Discrete Mathematical Methods for Modern Biology*, ed R Robeva (Burlington: Academic Press) pp 141-92
